# Supplementary material
Source: PubMed Central journal article supplement (PMC3992682)
Supplement: 1321803111_pnas.201321803SI.pdf [file 1321803111_pnas.201321803SI.pdf]

# Supporting Information

Higdon et al. 10.1073/pnas.1321803111

## SI Materials and Methods

**PCR Protocols and Primers for V $\beta$ 5 and Bcl-6 Genotyping.** V $\beta$ 5 primers were as follows: forward 5'-ACG TGT ATT CCC ATC TCT GG; reverse 5'-CTG TTC ATA ATT GGC CCG A. B-cell leukemia/lymphoma 6 (Bcl-6) primers were described previously (1). The V $\beta$ 5 PCR consisted of 15 min at 94 °C, 35 cycles of 30 s at 94 °C, 30 s at 61 °C, and 30 s at 72 °C, followed by 10 min at 72 °C. The Bcl-6 PCR consisted of 5 min at 94 °C, 35 cycles of 30 s at 94 °C, 30 s at 63 °C, and 30 s at 72 °C, followed by 10 min at 72 °C.

**Quantitative PCR Protocol and Primers.** PCRs were performed in 96-well Optical Reaction Plates (Applied Biosystems) and consisted of 2 min at 50 °C, and a 10-min 95 °C denaturation step, followed by 40 cycles of 15 s at 95 °C, 30 s at 60 °C, and 30 s at 72 °C, and then a dissociation stage (15 s at 95 °C, 30 s at 60 °C, and 15 s at 95 °C). The following primers were used: Bcl-6, forward 5'-GGA AGT TCA TCA AGG CCA GT; reverse 5'-GAC CTC GGT AGG CCA TGA, for a 114-nt product; blimp-1, forward 5'-AAA CTC CAT GAC CTC GCT ATG AC; reverse 5'-CAC CCT CAC CTC TGC ACT GA, for a 90-nt product; and hypoxanthine guanine phosphoribosyltransferase (HPRT), forward 5'-GTT GTT GGA TAT GCC CTT GAC; reverse 5'-CAA CTT

GCG CTC ATC TTA GGC, for a 111-nt product. IL-4 primers were described previously (2). Reactions were run in triplicate, and results for Bcl-6, B lymphocyte-induced maturation protein-1 (Blimp-1), and IL-4 were normalized to the internal HPRT control. Bcl-6, IL-4, and HPRT primers are intron-spanning; the Blimp-1 primers are not.

**Semiquantitative PCR Protocol and Primers.** cDNA samples were quantified on a NanoDrop 1000 (Thermo Scientific). Mtv-8 primers amplify the Mtv-8 superAg and were as follows: forward 5'-TCT AAA CAA TTC GGA GAA CTC; reverse 5'-AAG ACT TGG ATA AGT TCC A, for an 890-nt product. The Mtv-8 PCR consisted of 15 min at 95 °C, 31 cycles of 1 min at 94 °C, 1 min at 40 °C, and 1 min 30 s at 72 °C, followed by 10 min at 72 °C. PCR using the HPRT primers described for quantitative PCR (qPCR) was performed as a control for quantitation. The HPRT PCR consisted of 5 min at 94 °C, 31 cycles of 30 s at 94 °C, 30 s at 60 °C, and 30 s at 72 °C, followed by 10 min at 72 °C. Samples were run on a 2% agarose gel stained with SYBR Safe (Life Technologies). Bands were quantified relative to the lowest dilution of Mtv-8<sup>+</sup> blast cDNA on a ChemiDoc XRS+ (Bio-Rad) using Image Lab 4.1 software.

1. Dent AL, Hu-Li J, Paul WE, Staudt LM (1998) T helper type 2 inflammatory disease in the absence of interleukin 4 and transcription factor STAT6. *Proc Natl Acad Sci USA* 95 (23):13823–13828.

2. Newton C, et al. (2000) Induction of interleukin-4 (IL-4) by *Legionella pneumophila* infection in BALB/c mice and regulation of tumor necrosis factor alpha, IL-6, and IL-1 $\beta$ . *Infect Immun* 68(9):5234–5240.

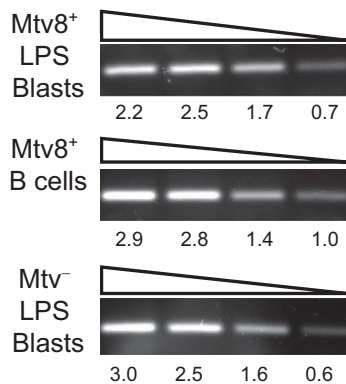

**Fig. S1.** HPRT control shows consistent cDNA quantification in semiquantitative PCR. Semiquantitative PCR was performed on serial threefold dilutions of Mtv-8<sup>+</sup> B-cell and blast and Mtv<sup>-</sup> blast cDNA for expression of HPRT, starting from 10 ng of cDNA. Numbers below gel images represent quantification of band intensity.

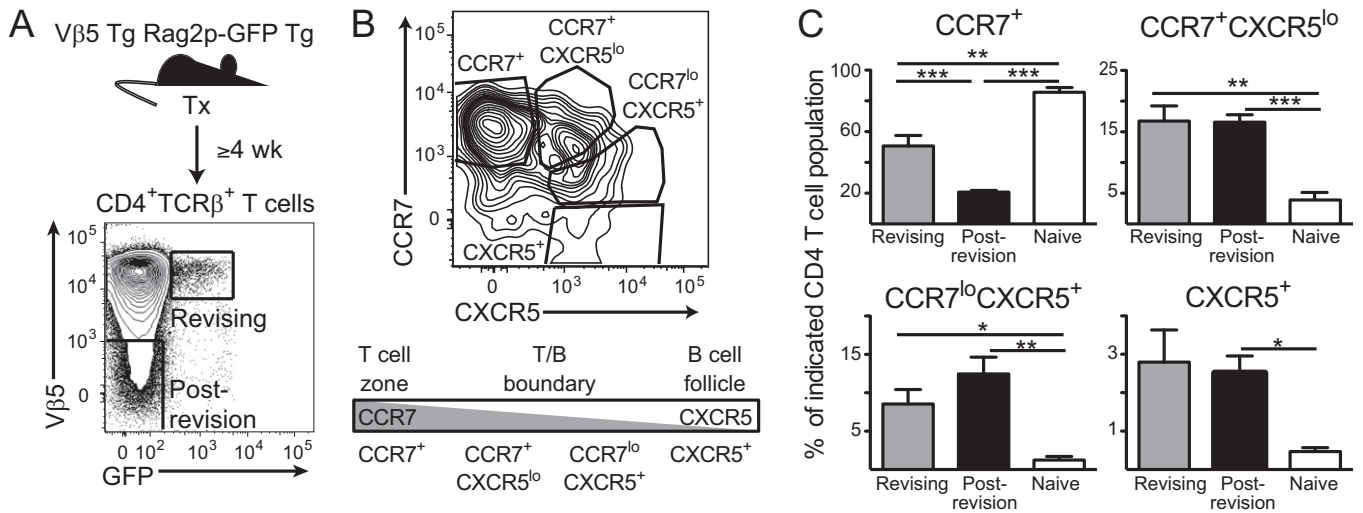

**Fig. S2.** Revising T cells tend to localize to the T cell-B cell boundary. (A) Peripheral CD4<sup>+</sup>TCRβ<sup>+</sup> cells from Rag2p-GFP transgenic (Tg) Vβ5 Tg mice thymectomized (Tx) 4–6 wk previously were identified as revising or postrevision T cells. (B) Representative flow-cytometric plot shows CCR7 and CXCR5 expression by revising T cells. Scheme for localizing lymphocytes within secondary lymphoid organs based on their chemokine receptor expression pattern. (C) Shown are the % of revising (gray), postrevision (black), or naive (white, defined as in Fig. 4) CD4 T cells expressing the indicated levels of chemokine receptors. Bars indicate mean ± SEM from four pools of two to three mice per group in three independent experiments. \**P* < 0.05, \*\**P* < 0.01, \*\*\**P* < 0.005.

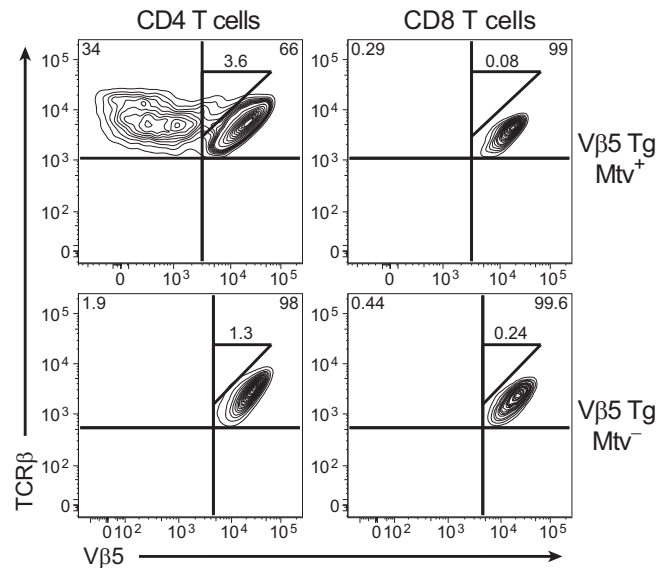

**Fig. S3.** Revising and postrevision CD4 T cells can be identified by flow cytometry. mLN cells from 28-wk-old Vβ5 Tg Mtv<sup>+</sup> and Mtv<sup>-</sup> mice were stained in separate experiments for CD4, CD8, Vβ5, and TCRβ. Revising T cells were identified as CD4<sup>+</sup>TCRβ<sup>+</sup>Vβ5<sup>lo</sup> cells (triangular gate), and postrevision T cells were identified as CD4<sup>+</sup>TCRβ<sup>+</sup>Vβ5<sup>-</sup> cells (upper left quadrant gate). Numbers in upper corners represent the percent of cells in that quadrant; numbers above triangular gate represent the percent of cells in that gate.

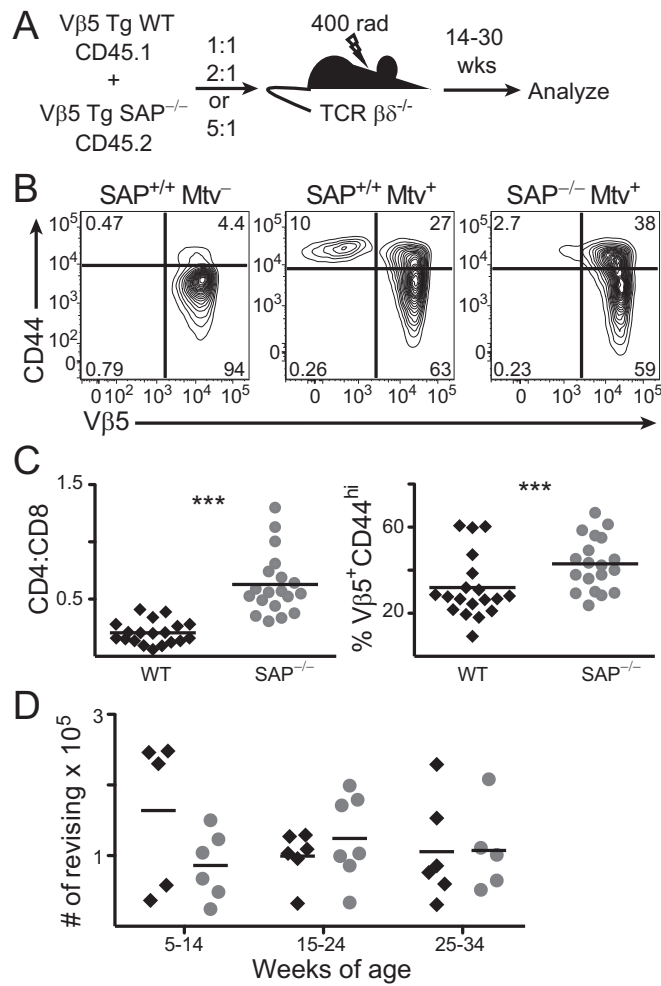

**Fig. 54.** SAP is not required for the initiation of revision. (A) Vβ5 Tg WT (black diamonds) and SAP<sup>-/-</sup> (gray circles) CD4 T cells were analyzed from the mLN of mixed bone-marrow chimeras 14–30 wk postreconstitution. (B) Representative flow-cytometric plots of mLN CD4 T cells from a 14-wk-old Vβ5 Tg Mtv<sup>-</sup> mouse and a recipient of Vβ5 Tg WT and SAP<sup>-/-</sup> bone marrow 14 wk postreconstitution. Numbers in corners represent the percent of cells in that quadrant. (C) Ratio of CD4:CD8 T cells and % Vβ5<sup>+</sup>CD44<sup>hi</sup> of CD4 T cells were analyzed in mLN of mixed bone-marrow chimeras. Data are from four independent groups of chimeras totaling 19 mice in seven independent experiments. (D) mLN CD4 T cells from 5- to 34-wk-old Vβ5 Tg WT and SAP<sup>-/-</sup> mice were analyzed for total number of revising T cells. Data are from three to seven mice per group in five to nine independent experiments. \*\*\**P* < 0.005.

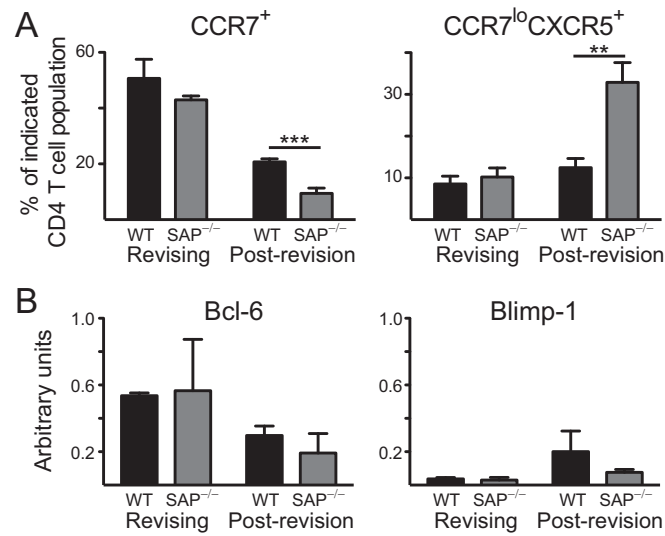

**Fig. S5.** Revising T cells are slightly less T follicular helper cell (Tfh)-like in the absence of SAP. V $\beta$ 5 Tg WT (black) and SAP<sup>-/-</sup> (gray) revising and postrevision T cells were analyzed for (A) % expressing the indicated chemokine receptors and (B) levels of RNA specific for Bcl-6 and Blimp-1. Bars indicate mean  $\pm$  SEM from three to seven mice per group in two to three independent experiments. \*\* $P < 0.01$ , \*\*\* $P < 0.005$ .

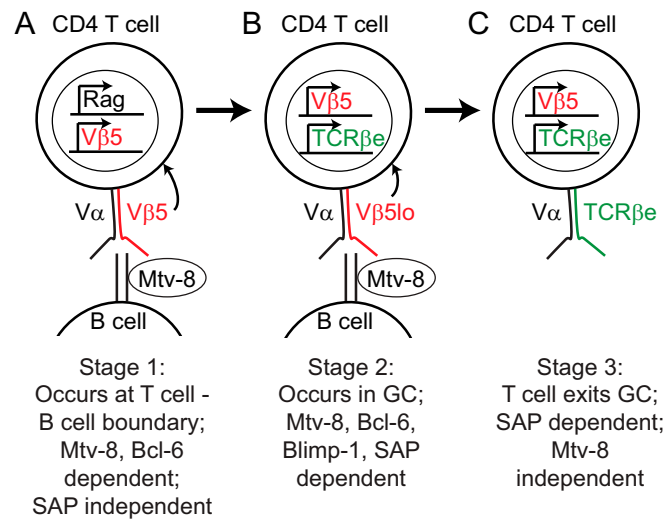

**Fig. S6.** Model of the multistep pathway of TCR revision. Revision occurs in three distinctly localized steps: (A) initiation at the T cell-B cell boundary, (B) completion in the germinal center (GC), and (C) exit from the GC.
